# Supplementary material
Source: PubMed Central journal article supplement (PMC1378129)

***Ehrlichia chaffeensis***

0.481M 0.482M 0.483M 0.484M 0.485M 0.486M 0.487M 0.488M 0.489M 0.49M 0.491M 0.492M 0.493M 0.494M 0.495M 0.496M 0.497M 0.498M 0.499M 0.5M 0.501M

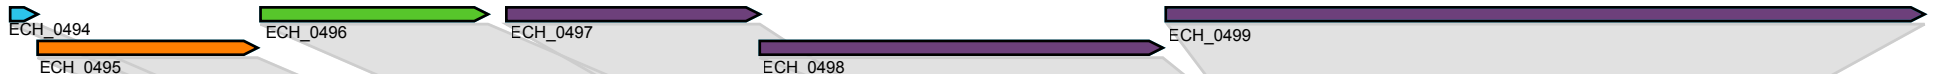

***Wolbachia pipientis wMel***

0.83M 0.829M 0.828M 0.827M 0.826M 0.825M 0.824M 0.823M 0.822M 0.821M 0.82M 0.819M 0.818M 0.817M

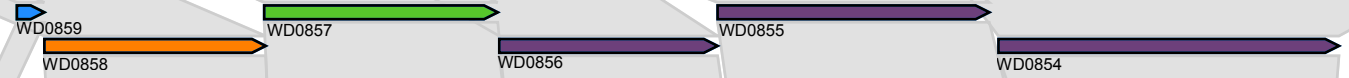

***Wolbachia sp. wBm***

1.065M 1.064M 1.063M 1.062M 1.061M 1.06M 1.059M 1.058M 1.057M 1.056M 1.055M 1.054M 1.053M

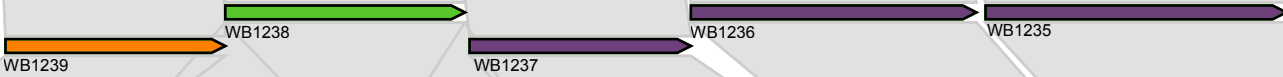

***Rickettsia conorii***

0.132M 0.133M 0.134M 0.135M 0.136M 0.137M 0.138M 0.139M 0.14M 0.141M 0.142M 0.143M 0.144M 0.145M 0.146M 0.147M 0.148M

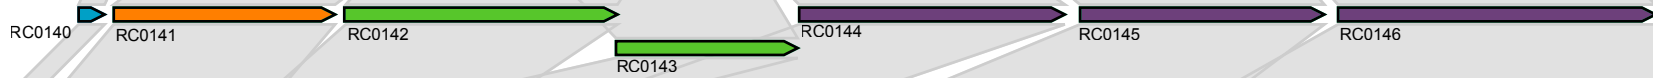

***Ehrlichia ruminantium***

0.9M 0.899M 0.898M 0.897M 0.896M 0.895M 0.894M 0.893M 0.892M 0.891M 0.89M 0.889M 0.888M 0.887M 0.886M 0.885M 0.884M 0.883M 0.882M

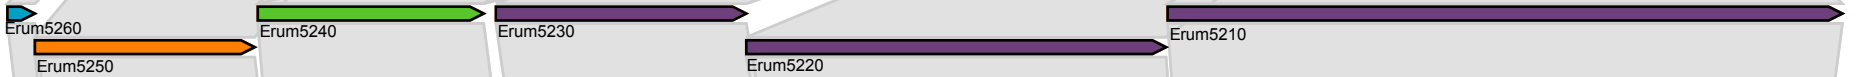

***Anaplasma phagocytophilum***

0.366M 0.367M 0.368M 0.369M 0.37M 0.371M 0.372M 0.373M 0.374M 0.375M 0.376M 0.377M 0.378M 0.379M 0.38M 0.381M 0.382M 0.383M 0.384M

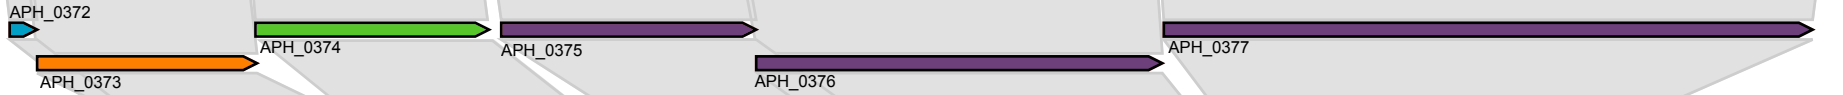

***Neorickettsia sennetsu***

774k 773k 772k 771k 770k 769k 768k 767k 766k 765k 764k 763k 762k 761k

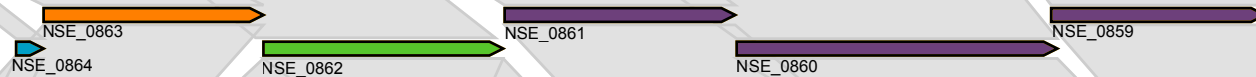

***Rickettsia prowazekii***

0.115M 0.116M 0.117M 0.118M 0.119M 0.12M 0.121M 0.122M 0.123M 0.124M 0.125M 0.126M 0.127M 0.128M 0.129M 0.13M

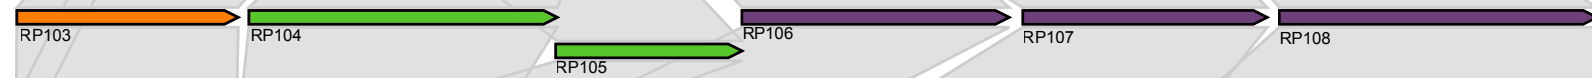

***Anaplasma marginale***

0.752M 0.751M 0.75M 0.749M 0.748M 0.747M 0.746M 0.745M 0.744M 0.743M 0.742M 0.741M 0.74M 0.739M 0.738M 0.737M 0.736M

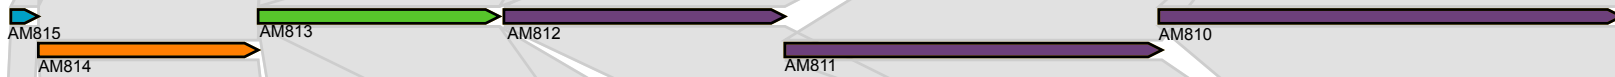

***Rickettsia typhi***

0.047M 0.046M 0.045M 0.044M 0.043M 0.042M 0.041M 0.04M 0.039M 0.038M 0.037M 0.036M 0.035M 0.034M 0.033M 0.032M 0.031M 0.03M

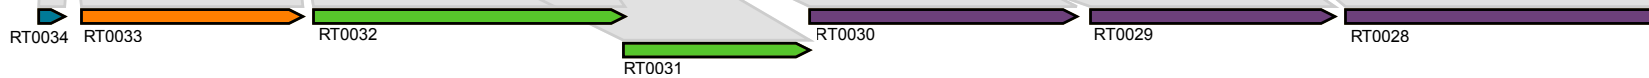

Supplement: pgen.0020021.sg004.pdf [file pgen.0020021.sg004.pdf]
