# Supplementary material
Source: PubMed Central journal article supplement (PMC1378129)

# *Ehrlichia chaffeensis* Arkansas

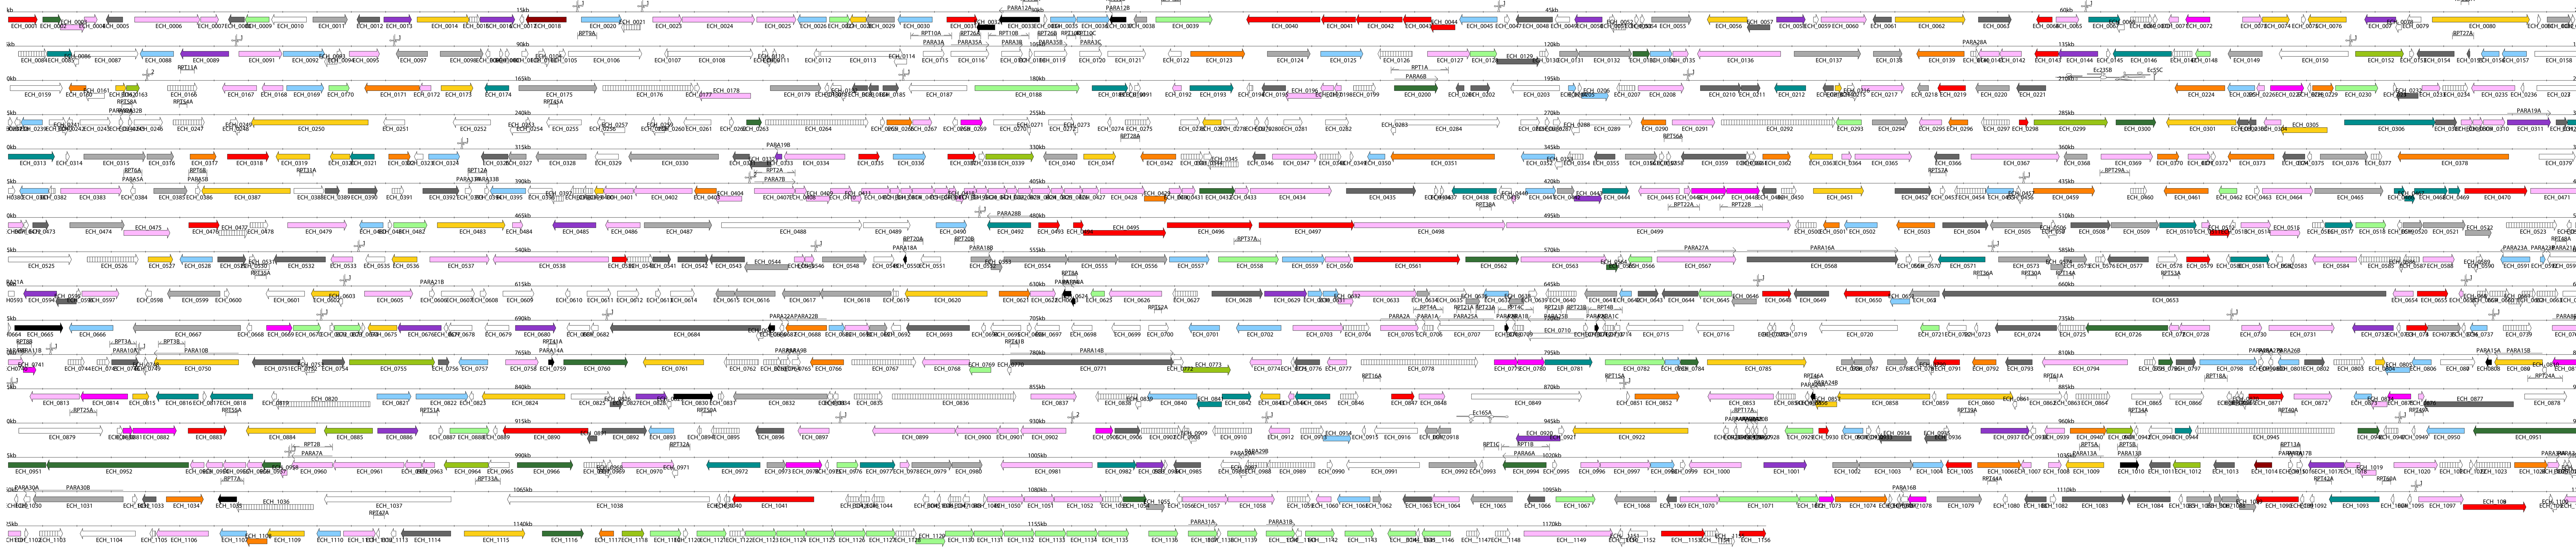

# *Anaplasma phagocytophilum* HZ

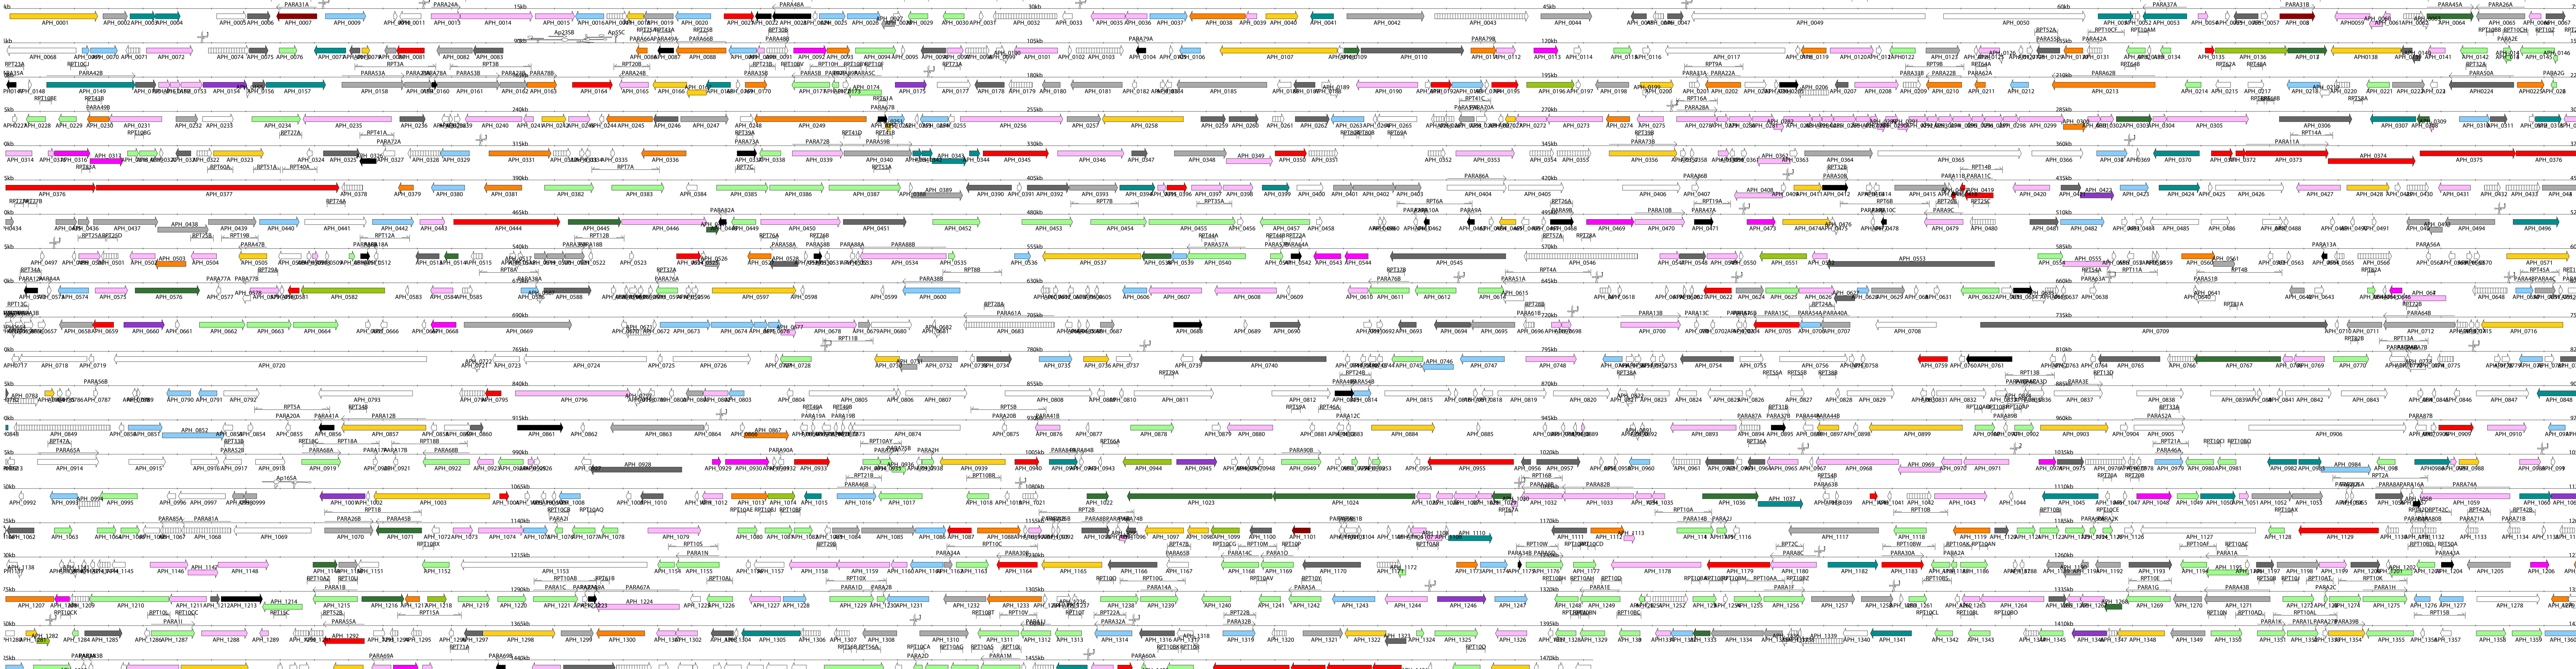

# *Neorickettsia sennetsu* Miyama

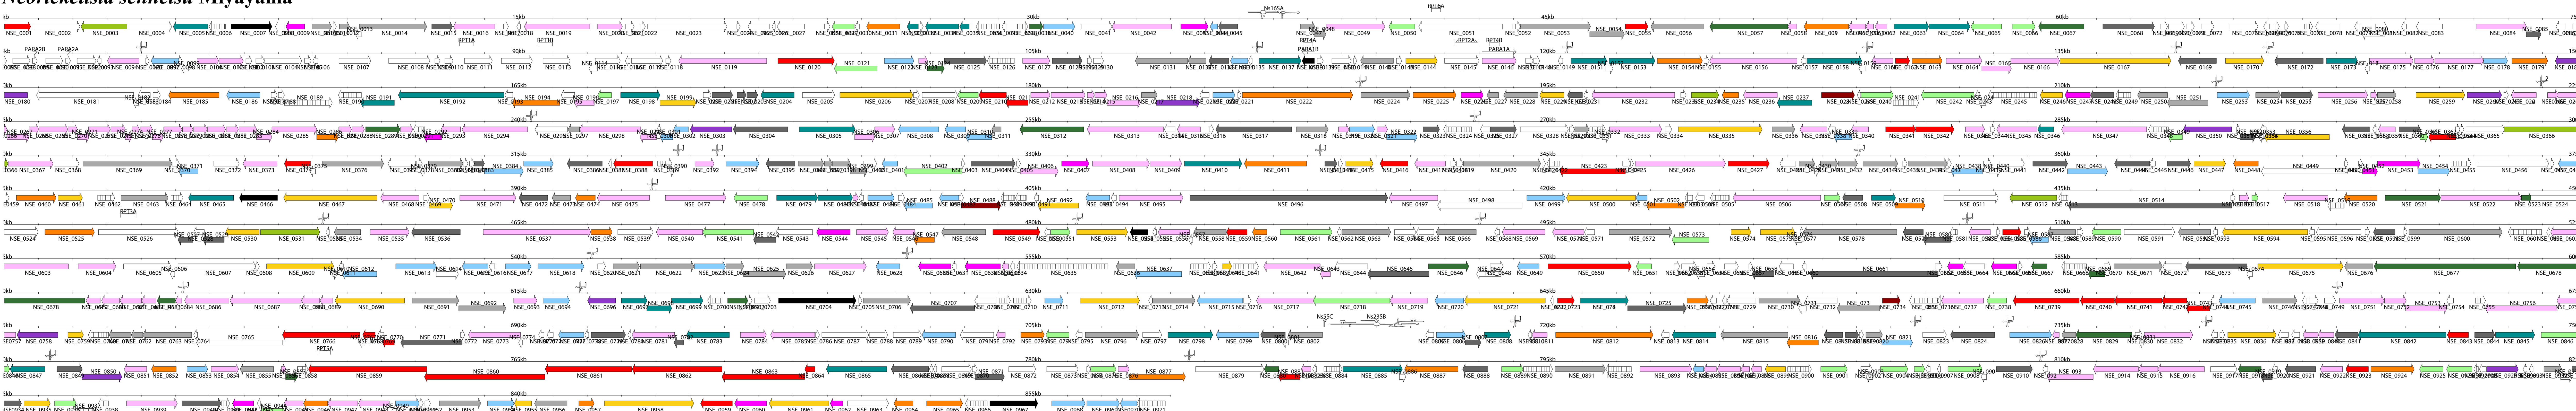

Supplement: pgen.0020021.sg001.pdf [file pgen.0020021.sg001.pdf]
