# Supplementary material
Source: PubMed Central journal article supplement (PMC1378129)

Supplementary Figure 2.

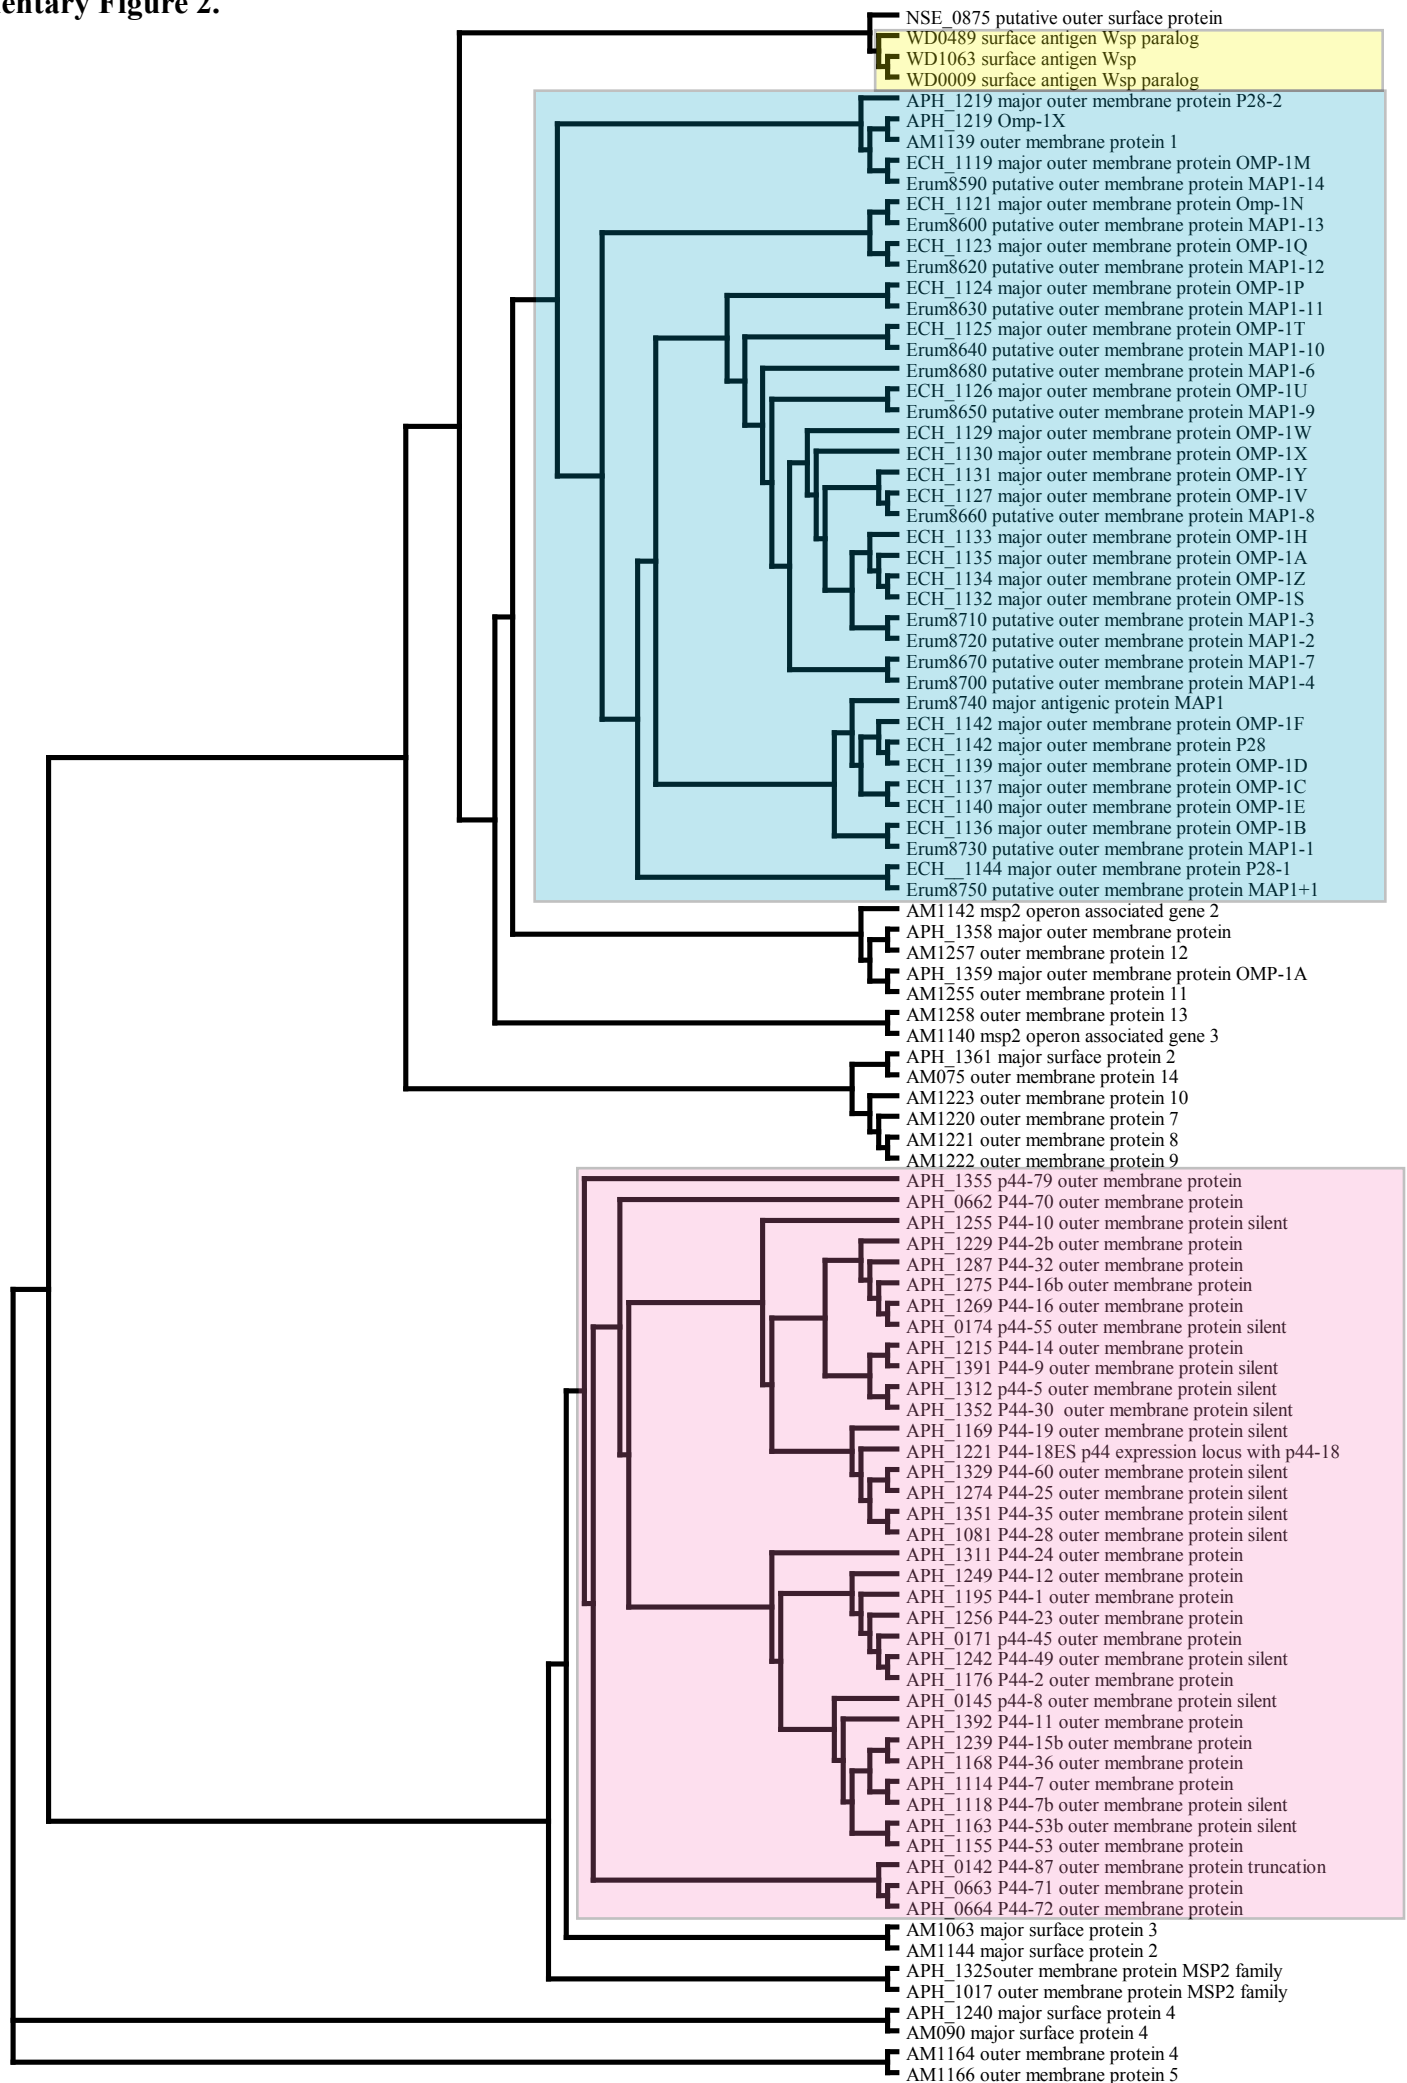

Supplement: pgen.0020021.sg002.pdf [file pgen.0020021.sg002.pdf]

Supplementary Figure 3.

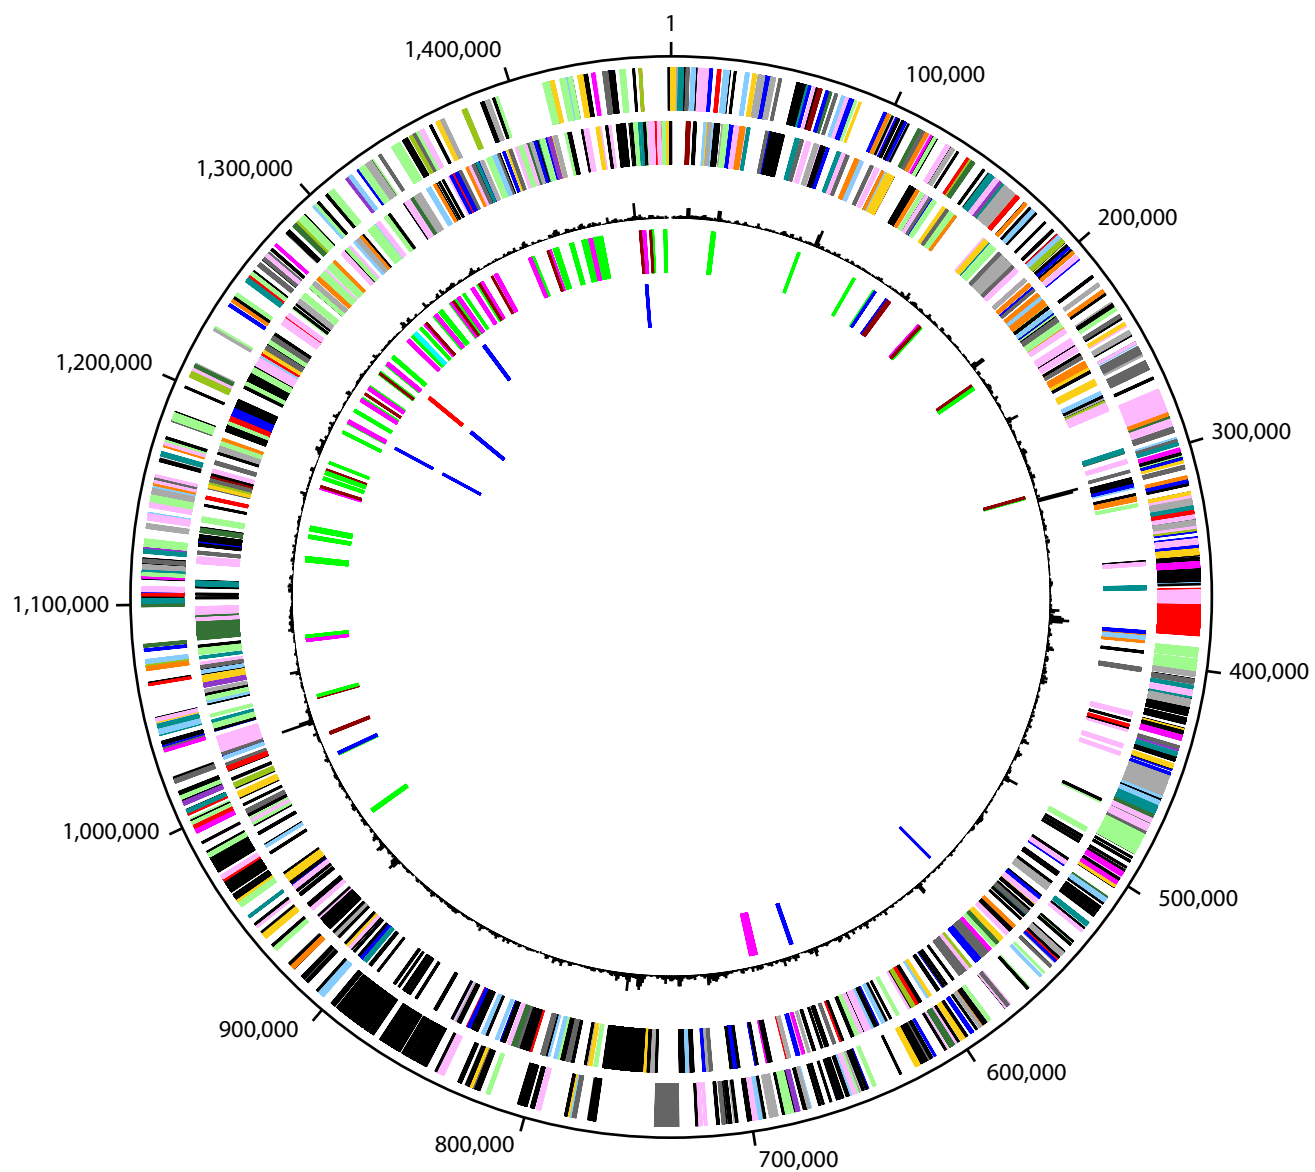

Supplement: pgen.0020021.sg003.pdf [file pgen.0020021.sg003.pdf]
